# Supplementary material
Source: PubMed Central journal article supplement (PMC8988368)
Supplement: NIHMS1791248-supplement-Supplementary_Table_1.pdf [file NIHMS1791248-supplement-Supplementary_Table_1.pdf]

**Supplementary Table 1: Mouse Fibroblast Phenotypes**

| <b>Abbreviation</b> | <b>Definition</b>                                                                                                                                                                                                                                                                                                                                                                                                                                                     |
|---------------------|-----------------------------------------------------------------------------------------------------------------------------------------------------------------------------------------------------------------------------------------------------------------------------------------------------------------------------------------------------------------------------------------------------------------------------------------------------------------------|
| JUN                 | Mice that ubiquitously express the reverse tetracycline transactivator (rtTA) from the Rosa26 locus and the tetracycline operator minimal promoter (tetOP). Upon administration of a tetracycline or tetracycline derivative such as doxycycline ('dox'), rtTA binds the tetOP promoter and induces JUN expression within all cells.                                                                                                                                  |
| Control             | Rosa26-rtTA mice have the rtTA construct but deficient of tetOP and thus serve as controls.                                                                                                                                                                                                                                                                                                                                                                           |
| JUN-Fib             | JUN mice that have been crossed with the offspring of ROSA26 <sup>mT/mG</sup> reporter mice crossed with $\alpha$ -SMA. <sup>CreER</sup> transgenic mice. Upon administration of tamoxifen, Cre recombinase removes the floxed Rosa26 <sup>mT/mG</sup> cassette, resulting in expression of targeted enhanced green fluorescent protein (eGFP) in $\alpha$ -SMA positive cells. The mice express JUN in $\alpha$ -SMA positive cells following doxycycline induction. |
| Control-Fib         | JUN-Fib mice that have been induced with tamoxifen without doxycycline.                                                                                                                                                                                                                                                                                                                                                                                               |
| JUN-Col 1           | JUN mice that have been crossed with the offspring of ROSA26 <sup>mT/mG</sup> reporter mice crossed with Col 1. <sup>CreER</sup> transgenic mice. Upon administration of tamoxifen, Cre recombinase removes the floxed Rosa26 <sup>mT/mG</sup> cassette, resulting in expression of targeted enhanced green fluorescent protein (eGFP) in Col 1 positive cells. The mice express JUN in Col 1 positive cells following doxycycline induction.                         |
| Control-Col 1       | JUN-Col 1 mice that have been induced tamoxifen without doxycycline.                                                                                                                                                                                                                                                                                                                                                                                                  |
