# Supplementary material
Source: PubMed Central journal article supplement (PMC8988368)
Supplement: NIHMS1791248-supplement-Supplementary_Table_2.pdf [file NIHMS1791248-supplement-Supplementary_Table_2.pdf]

**Supplementary Table 2: Human Fibroblast Phenotypes**

| <b>Abbreviation</b> | <b>Definition</b>                                                                    |
|---------------------|--------------------------------------------------------------------------------------|
| hHTS                | Human fibroblasts derived from hypertrophic scars.                                   |
| hKel                | Human fibroblasts derived from keloid scars.                                         |
| hSc                 | Human fibroblasts derived from normal scars (non-keloid and non-hypertrophic scars). |
| hNS                 | Human fibroblasts derived from unwounded skin.                                       |
