# Supplementary material
Source: PubMed Central journal article supplement (PMC8988368)
Supplement: NIHMS1791248-supplement-Supplementary_Table_3.pdf [file NIHMS1791248-supplement-Supplementary_Table_3.pdf]

**Supplementary Table 3: Primer sequences used in the study for RT-qPCR analysis.**

| <b>Gene</b> | <b>Forward</b>         | <b>Reverse</b>           |
|-------------|------------------------|--------------------------|
| CD36        | CATGTCTTGCTGTTGATTTG   | AGCCATTTTTCTTGTTTCAG     |
| JUN         | AAAGGATAGTGCGATGTTTC   | TAAAATCTGCCACCAATTCC     |
| FABP4       | CCACCATAAAGAGAAAACGAG  | AGTTGCTTGCTAAATCATGG     |
| FABP5       | AAGATGGGAAATTAGTGGTG   | AACAGTATGGAGATTTGCTC     |
| Perilipin   | GGAGTGACAGGAATTGTTTC   | CTCAAGCTTCAAACCTTCTTC    |
| PPARG       | AAAGAAGCCAACACTAAACC   | TGGTCATTTTCGTTAAAGGC     |
| ADIPOQ      | GCTCTTATTGGTCCTAAGGG   | GTAGAAGATCTTGGTAAAGCG    |
| VEGF        | CAGATCACAGGTACAGGGATGA | GCAGAGCTGAGTGTTAGCAAAA   |
| COL1        | CATGTTTCAGCTTTGTGGACCT | GCAGCTGACTTCAGGGATGT     |
| COL3        | TCCCCTGGAATCTGTGAATC   | TGAGTCGAATTGGGGAGAAT     |
| TGF-beta    | AAGAAGTCACCCGCGTGCTA   | TGTGTGATGTCTTTGGTTTTGTCA |
| GAPDH       | CTTTTGCGTCGCCAG        | TTGATGGCAACAATATCCAC     |

*ADIPOQ; Adiponectin, Col1; Collagen type I, Col3; Collagen Type III, FABP4; Fatty Acid Binding Protein 4, FABP5; Fatty acid-binding protein 5, PPARG; Peroxisome proliferator-activated receptor gamma. TGF-beta; Transforming growth factor beta, VEGF; Vascular endothelial growth factor.*
